# Supplementary material for: Loss of heterozygosity of TRIM3 in malignant gliomas
Source: PubMed Central journal article supplement (PMC2653542; doi:10.1186/1471-2407-9-71), 2009-02-27
Supplement: 1471-2407-9-71-S1.pdf [file 1471-2407-9-71-S1.pdf]

## Boulay et al: Loss of heterozygosity of TRIM3 in malignant glioma

### Additional file 1 - LOH data for all gliomas investigated

Gliomas are anonymously numbered according to patient data. The 11p15 microsatellite markers / sequence tag sites used are indicated (D11S1318, D11S1758, D11S1997, D11S4905, D11S1331, D11S1250). Abbreviations: GBM, Glioblastoma multiforme; AS, astrocytoma; OG, oligodendroglioma; ND, not determined; RET, retention; LOH, loss of heterozygosity; NI, non-informative; I-III, WHO grade.

| tumor# | type/grade | D11S1318 | D11S1758 | D11S1997 | D11S4905 | D11S1331 | D11S1250 |
|--------|------------|----------|----------|----------|----------|----------|----------|
| 4      | GBM        | ND       | RET      | RET      | RET      | NI       | ND       |
| 5      | GBM        | RET      | RET      | RET      | RET      | RET      | NI       |
| 6      | GBM        | ND       | LOH      | LOH      | LOH      | LOH      | ND       |
| 11     | GBM        | ND       | NI       | RET      | RET      | RET      | ND       |
| 29     | GBM        | ND       | RET      | RET      | RET      | RET      | ND       |
| 30     | GBM        | ND       | LOH      | LOH      | LOH      | LOH      | ND       |
| 38     | GBM        | RET      | NI       | RET      | NI       | RET      | RET      |
| 45     | GBM        | ND       | RET      | RET      | NI       | RET      | ND       |
| 47     | GBM        | ND       | NI       | RET      | RET      | RET      | ND       |
| 56     | GBM        | ND       | RET      | RET      | RET      | RET      | ND       |
| 59     | GBM        | RET      | RET      | NI       | RET      | RET      | RET      |
| 60     | GBM        | ND       | RET      | NI       | RET      | RET      | ND       |
| 64     | GBM        | ND       | LOH      | NI       | LOH      | LOH      | ND       |
| 69     | GBM        | RET      | RET      | NI       | RET      | RET      | RET      |
| 70     | GBM        | ND       | RET      | RET      | RET      | RET      | ND       |
| 72     | GBM        | RET      | RET      | RET      | RET      | NI       | NI       |
| 78     | GBM        | ND       | LOH      | LOH      | LOH      | NI       | ND       |
| 91     | GBM        | ND       | LOH      | LOH      | NI       | LOH      | ND       |
| 93     | GBM        | NI       | NI       | RET      | RET      | RET      | RET      |
| 116    | GBM        | RET      | NI       | RET      | NI       | RET      | RET      |
| 117    | GBM        | RET      | RET      | RET      | RET      | NI       | RET      |
| 128    | GBM        | NI       | RET      | RET      | RET      | RET      | RET      |
| 132    | GBM        | NI       | RET      | RET      | NI       | RET      | NI       |
| 138    | GBM        | RET      | RET      | RET      | RET      | NI       | NI       |
| 143    | GBM        | NI       | NI       | RET      | RET      | RET      | NI       |
| 145    | GBM        | RET      | RET      | RET      | RET      | RET      | NI       |
| 146    | GBM        | RET      | NI       | RET      | RET      | RET      | RET      |

| tumor# | type/grade | D11S1318 | D11S1758 | D11S1997 | D11S4905 | D11S1331 | D11S1250 |
|--------|------------|----------|----------|----------|----------|----------|----------|
| 149    | GBM        | LOH      | LOH      | NI       | NI       | NI       | NI       |
| 153    | GBM        | RET      | RET      | RET      | NI       | RET      | RET      |
| 155    | GBM        | ND       | LOH      | NI       | LOH      | LOH      | ND       |
| 154    | GBM        | ND       | ND       | RET      | NI       | RET      | RET      |
| 157    | GBM        | LOH      | LOH      | LOH      | LOH      | LOH      | LOH      |
| 161    | GBM        | RET      | NI       | RET      | NI       | RET      | NI       |
| 163    | GBM        | NI       | NI       | RET      | RET      | RET      | RET      |
| 164    | GBM        | NI       | NI       | NI       | LOH      | NI       | NI       |
| 167    | GBM        | RET      | RET      | RET      | NI       | LOH      | NI       |
| 170    | GBM        | ND       | NI       | NI       | RET      | RET      | ND       |
| 171    | GBM        | RET      | NI       | RET      | NI       | RET      | RET      |
| 101    | ASI        | RET      | RET      | RET      | NI       | RET      | RET      |
| 51     | ASII       | NI       | RET      | RET      | RET      | NI       | NI       |
| 61     | ASII       | LOH      | LOH      | NI       | RET      | RET      | NI       |
| 85     | ASII       | RET      | RET      | NI       | RET      | RET      | RET      |
| 120    | ASII       | RET      | RET      | NI       | RET      | RET      | NI       |
| 141    | ASII       | LOH      | LOH      | LOH      | LOH      | NI       | LOH      |
| 152    | ASII       | NI       | RET      | RET      | RET      | RET      | RET      |
| 159    | ASII       | RET      | RET      | RET      | NI       | NI       | RET      |
| 23     | ASIII      | RET      | NI       | LOH      | NI       | RET      | NI       |
| 67     | ASIII      | RET      | NI       | RET      | RET      | RET      | NI       |
| 98     | ASIII      | NI       | NI       | LOH      | LOH      | LOH      | NI       |
| 22     | OGII       | NI       | RET      | RET      | RET      | RET      | RET      |
| 40     | OGII       | LOH      | LOH      | LOH      | LOH      | LOH      | LOH      |
| 52     | OGII       | NI       | RET      | RET      | NI       | NI       | RET      |
| 77     | OGII       | RET      | RET      | RET      | RET      | NI       | RET      |
| 79     | OGII       | NI       | RET      | RET      | RET      | NI       | RET      |
| 87     | OGII       | RET      | NI       | NI       | RET      | NI       | NI       |
| 92     | OGII       | RET      | RET      | RET      | RET      | NI       | NI       |
| 112    | OGII       | RET      | RET      | RET      | RET      | RET      | NI       |
| 115    | OGII       | RET      | RET      | RET      | RET      | NI       | NI       |
| 169    | OGII       | RET      | RET      | RET      | NI       | RET      | RET      |
